# Supplementary material for: Preparation of bifunctionalized phenylene-bridged periodic mesoporous organosilica for solid-phase microextraction
Source: Royal Society of Chemistry journal article supplement (doi:10.1039/c3ra46178e), 2013-10-31
Supplement: c3ra46178e.pdf [file c3ra46178e.pdf]

Supplementary Information

**Preparation of bifunctionalized phenylene-bridged periodic mesoporous organosilica for solid-phase microextraction**

Liao Yuan Xia<sup>\*a, b</sup>, Yun Chu Hu<sup>a</sup>, Min Zhi Rong<sup>b</sup> and Yong Jin Liang<sup>b</sup>

<sup>a</sup>*College of Material Science and Engineering, Central South University of Forestry and Technology, Changsha 410004, P. R. China*

<sup>b</sup>*Key Laboratory for Polymeric Composite and Functional Materials of Ministry of Education, School of Chemistry and Chemical Engineering, Sun Yat-sen University, Guangzhou 510275, P. R. China.*

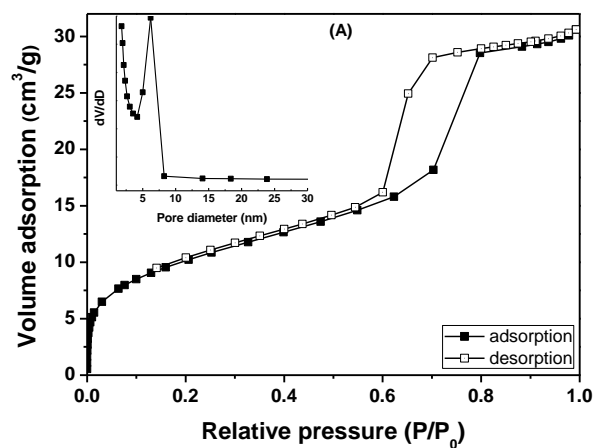

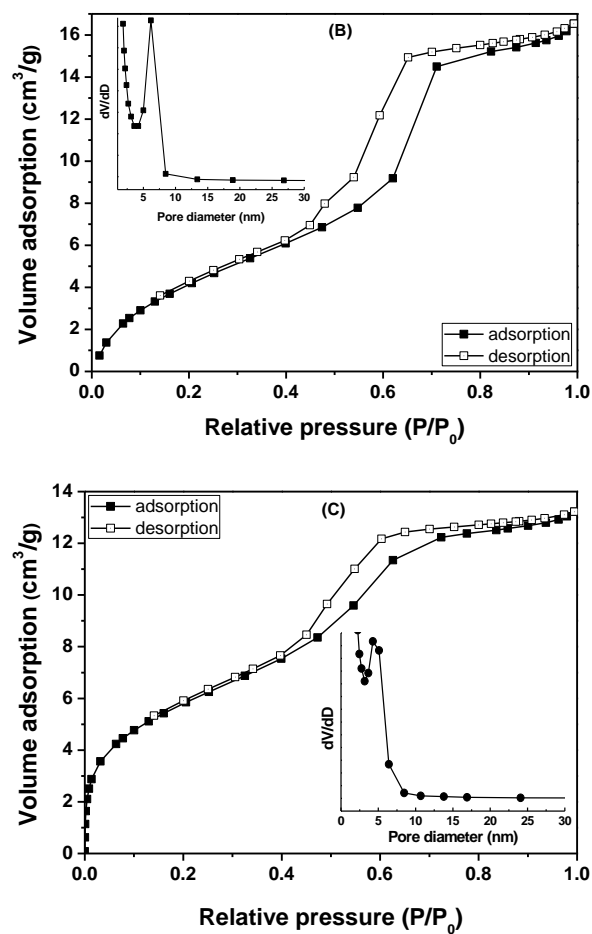

**Fig. S1** Nitrogen adsorption-desorption isotherms and corresponding pore size distributions (inset) of BPMOs with various molar percentages of TEVS: (A), 0%; (B), 5%; (C), 25%.
